# Supplementary material
Source: publisher site journal article supplement (https://www.spandidos-publications.com/6148/downloadSupplementary)
Supplement: Supplementary file 1 [file downloadSupplementary]

Table SI. Clinical features for post-transplant patients admitted to the ICU.

| Characteristics                                               | All patients,<br>n=108 | Survivors<br>, n=50 | Non-survi<br>vors,<br>n=58 | P-val<br>ue |
|---------------------------------------------------------------|------------------------|---------------------|----------------------------|-------------|
| Median age (range), years                                     | 41(18-69)              | 38.5<br>(29-56)     | 42<br>(31.5-53)            | 0.87<br>0   |
| Sex, female, n (%)                                            | 73 (67.6)              | 33 (66.0)           | 40 (69.0)                  | 0.74<br>3   |
| Hematologic malignancies, n (%)                               |                        |                     |                            | 0.69<br>7   |
| Acute leukemia                                                | 77 (71.3)              | 39 (78.0)           | 38 (65.5)                  |             |
| Chronic leukemia                                              | 8 (7.4)                | 3 (6.0)             | 5 (8.6)                    |             |
| Lymphoma                                                      | 9 (8.3)                | 4 (8.0)             | 5 (8.6)                    |             |
| Myelodysplastic syndromes                                     | 11 (10.2)              | 3 (6.0)             | 8 (13.8)                   |             |
| Other                                                         | 3 (2.8)                | 1 (2.0)             | 2 (3.5)                    |             |
| The type of hematopoietic stem<br>cell transplantation, n (%) |                        |                     |                            | 0.51<br>4   |
| Identical sibling donor                                       | 25 (23.1)              | 13 (26.0)           | 12 (20.7)                  |             |
| Haploidentical donor                                          | 83 (76.9)              | 37 (74.0)           | 46 (79.3)                  |             |
| Leading cause for ICU admission,<br>n (%) <sup>a</sup>        |                        |                     |                            |             |
| Respiratory failure                                           | 52 (48.1)              | 29 (58.0)           | 23 (39.7)                  | 0.05<br>7   |
| Liver failure                                                 | 23 (21.3)              | 10 (20.0)           | 13 (22.4)                  | 0.76<br>0   |
| Acute kidney injury                                           | 5 (4.6)                | 1 (2.0)             | 4 (6.9)                    | 0.37<br>0   |
| Disorders of consciousness                                    | 6 (5.6)                | 2 (4.0)             | 4 (6.9)                    | 0.68<br>4   |

|                         |         |         |          |           |
|-------------------------|---------|---------|----------|-----------|
| Alveolar hemorrhage     | 5 (4.6) | 2 (4.0) | 3 (5.2)  | 1.00<br>0 |
| Septic shock            | 9 (8.3) | 1 (2.0) | 8 (13.8) | 0.03<br>6 |
| Cerebrovascular disease | 2 (1.9) | 1 (2.0) | 1 (1.7)  | 1.00<br>0 |
| Heart failure           | 1 (0.9) | 0 (0)   | 1 (0.9)  | 1.00<br>0 |
| Other                   | 5 (4.6) | 4 (8.0) | 1 (1.7)  | 0.18<br>0 |

HSCT, hematopoietic stem cell transplantation; ICU, intensive care unit.

<sup>a</sup>For patients with several diseases at the time of ICU admission, only the most severe condition was considered as the cause for admission.

Table SII. Characteristics of patients receiving HSCT.

| Characteristics                                            | Survivors<br>(n=50) | Non-Survivors<br>(n=58) | P-value |
|------------------------------------------------------------|---------------------|-------------------------|---------|
| WBC counts at diagnosis (range), $\times 10^9/l$           | 8.4<br>(1.0-364.7)  | 7.9<br>(0.8-399.0)      | 0.230   |
| Bone marrow blasts at diagnosis (range), %                 | 54.5<br>(0-97.0)    | 41.0<br>(0-98.0)        | 0.290   |
| Disease risk index before HSCT, n (%)                      |                     |                         | 0.405   |
| Low-risk                                                   | 14 (28.0)           | 12 (20.7)               |         |
| Intermediate-risk                                          | 22 (44.0)           | 33 (56.9)               |         |
| High-risk                                                  | 14 (28.0)           | 13 (22.4)               |         |
| The type of hematopoietic stem cell transplantation, n (%) |                     |                         | 0.514   |
| Identical sibling donor                                    | 13 (26.0)           | 12(20.7)                |         |
| Haploidentical donor                                       | 37 (74.0)           | 46(79.3)                |         |
| Donor-recipient sex matching, n (%)                        |                     |                         | 0.970   |
| Male-female                                                | 8 (16.0)            | 11(19.0)                |         |
| Male-male                                                  | 18 (36.0)           | 20(34.5)                |         |
| Female-female                                              | 8 (16.0)            | 8 (13.8)                |         |
| Female-male                                                | 16 (32.0)           | 19 (32.8)               |         |
| Relationship of donor, n (%)                               |                     |                         | 0.735   |
| Parental                                                   | 12 (24.0)           | 19 (32.8)               |         |
| Sibling                                                    | 24 (48.0)           | 25 (43.1)               |         |
| Children                                                   | 13 (26.0)           | 12 (20.7)               |         |
| Other                                                      | 1 (2.0)             | 2 (3.4)                 |         |
| Donor and recipient blood groups, n (%)                    |                     |                         | 0.768   |
| Same                                                       | 29 (58.0)           | 32 (55.2)               |         |

|                                  |           |           |       |
|----------------------------------|-----------|-----------|-------|
| Different                        | 21 (42.0) | 26 (44.8) |       |
| Homozygous loci, n (%)           |           |           | 0.807 |
| 3/6                              | 32 (64.0) | 40 (69.0) |       |
| 4/6                              | 5 (10.0)  | 6 (10.3)  |       |
| 6/6                              | 13 (26.0) | 12 (20.7) |       |
| GVHD after HSCT, n (%)           |           |           |       |
| aGVHD                            | 21 (36.2) | 11 (22.0) | 0.107 |
| cGVHD                            | 6 (10.3)  | 4 (8.0)   | 0.931 |
| Chimeric state after HSCT, n (%) |           |           | 0.916 |
| Partial chimerism                | 1 (2.0)   | 1 (1.7)   |       |
| Complete chimerism               | 49 (98.0) | 57 (98.3) |       |

HSCT, hematopoietic stem cell transplantation; WBC, white blood cell.

Table SIII. Characteristics of clinical tests on the day of ICU admission and treatments in ICU.

| Characteristics                                           | Survivors, n=50            | Non-survivors, n=58        | P-value    |
|-----------------------------------------------------------|----------------------------|----------------------------|------------|
| Laboratory test on day of ICU admission                   |                            |                            |            |
| Median lactate (range), mmol/l                            | 1.05 (0.70-1.80)           | 1.60 (0.90-2.82)           | 0.004      |
| Median white blood cell count (range), 10 <sup>9</sup> /l | 4.12 (2.27-7.18)           | 2.91 (1.10-6.48)           | 0.100      |
| Median neutrophil count (range), 10 <sup>9</sup> /l       | 2.68 (1.23-5.77)           | 1.83 (0.37-4.77)           | 0.158      |
| Neutropenia, n (%)                                        | 5 (10.0)                   | 15 (25.9)                  | 0.034      |
| Median lymphocyte count (range), 10 <sup>9</sup> /l       | 0.56 (0.32-1.22)           | 0.30 (0.13-0.86)           | 0.017      |
| Median hemoglobin (range), g/l                            | 83.00<br>(71.75-100.50)    | 71.00<br>(57.00-84.00)     | <0.001     |
| Median platelet count (range), 10 <sup>9</sup> /l         | 38.50<br>(19.75-83.75)     | 25.00<br>(14.75-50.75)     | 0.008      |
| Median creatinine (range), µmol/l                         | 70.00<br>(59.00-93.50)     | 75.50<br>(58.75-145.25)    | 0.153      |
| Median bilirubin (range), µmol/l                          | 15.55<br>(7.85-45.83)      | 52.95<br>(11.70-153.48)    | 0.022      |
| Median serum potassium (range), mmol/l                    | 3.83 (3.32-4.43)           | 3.89(3.32-4.43)            | 0.586      |
| Median brain natriuretic peptide (range), pg/ml           | 138.50<br>(4900-366.75)    | 268.00<br>(125.50-721.25)  | 0.006      |
| Median fibrin degradation product (range), mg/l           | 4.35 (2.30-10.82)          | 8.10 (5.10-24.33)          | <0.001     |
| Median D-dimer (range), µg/l                              | 509.50<br>(218.75-1134.25) | 841.50<br>(445.00-2966.25) | 0.002      |
| HCT-CI, median (range)                                    | 249.00<br>(116.25-411.75)  | 424.50<br>(369.75-500.00)  | <<br>0.001 |
| Median APACHE II score at admission (range)               | 18.00<br>(15.00-22.00)     | 23.50<br>(19.00-29.00)     | <<br>0.001 |
| Treatment at ICU admission, n (%)                         |                            |                            |            |

|                                         |                 |              |        |
|-----------------------------------------|-----------------|--------------|--------|
| Use of vasoactive drugs                 | 5 (10.0)        | 24 (41.4)    | <0.001 |
| Invasive mechanical ventilation         | 1 (2.0)         | 22 (37.9)    | <0.001 |
| Non-invasive mechanical ventilation     | 29 (58.0)       | 35 (60.3)    | 0.805  |
| Continuous renal replacement therapy    | 2 (4.0)         | 7 (12.1)     | 0.172  |
| Plasma exchange                         | 10 (20.0)       | 18 (31.0)    | 0.192  |
| Median length of ICU stay (range), days | 10.0 (1.0-39.0) | 6.5 (0-39.0) | 0.052  |

HCT-CI, hematopoietic cell transplantation comorbidity Index; APACHE II, acute physiology and chronic health evaluation II; ICU, intensive care unit.

Table SIV. Univariable analyses of prognostic factors for ICU mortality.

| Variable                                | HR    | 95% CI    | P-value |
|-----------------------------------------|-------|-----------|---------|
| Sex                                     |       |           |         |
| Male                                    | 1.00  |           | 0.568   |
| Female                                  | 0.850 | 0.49-1.49 |         |
| Age                                     |       |           |         |
| ≤median                                 | 1.00  |           | 0.965   |
| >median                                 | 0.99  | 0.58-1.67 |         |
| Hematologic malignancies                |       |           |         |
| Acute leukemia                          | 1.00  |           |         |
| Chronic leukemia                        | 1.99  | 0.78-5.14 | 0.152   |
| Lymphoma                                | 2.09  | 0.97-4.51 | 0.061   |
| Myelodysplastic syndromes               | 2.00  | 0.96-4.13 | 0.061   |
| Other                                   | 0.59  | 0.08-4.42 | 0.610   |
| Hematopoietic stem cell transplantation |       |           |         |
| Identical sibling donor                 | 1.00  |           |         |
| Haploidentical donor                    | 0.99  | 0.52-1.88 | 0.980   |
| Reason for ICU admission                |       |           |         |
| Respiratory failure                     |       |           |         |
| No                                      | 1.00  |           | 0.001   |
| Yes                                     | 0.41  | 0.24-0.71 |         |
| Liver failure                           |       |           |         |
| No                                      | 1.00  |           | 0.200   |
| Yes                                     | 1.51  | 0.80-2.83 |         |

|                                         |      |           |       |
|-----------------------------------------|------|-----------|-------|
| Acute kidney injury                     |      |           |       |
| No                                      | 1.00 |           | 0.232 |
| Yes                                     | 1.87 | 0.67-5.20 |       |
| Unconsciousness                         |      |           |       |
| No                                      | 1.00 |           | 0.096 |
| Yes                                     | 2.41 | 0.86-6.82 |       |
| Alveolar hemorrhage                     |      |           |       |
| No                                      | 1.00 |           | 0.536 |
| Yes                                     | 1.45 | 0.45-4.68 |       |
| Cerebrovascular disease                 |      |           |       |
| No                                      | 1.00 |           | 0.890 |
| Yes                                     | 1.15 | 0.16-8.40 |       |
| Heart failure                           |      |           |       |
| No                                      | 1.00 |           | 0.906 |
| Yes                                     | 0.89 | 0.12-6.49 |       |
| Septic shock                            |      |           |       |
| No                                      | 1.00 |           | 0.067 |
| Yes                                     | 2.30 | 1.06-4.95 |       |
| HCT-CI                                  |      |           |       |
| ≤median                                 | 1.00 |           | 0.039 |
| >median                                 | 1.73 | 1.03-2.91 |       |
| APACHE II score at admission            |      |           |       |
| ≤median                                 | 1.00 |           | 0.001 |
| >median                                 | 2.58 | 1.50-4.42 |       |
| Laboratory test on day of ICU admission |      |           |       |
| lactate (mmol/l)                        |      |           |       |

|                                             |      |           |        |
|---------------------------------------------|------|-----------|--------|
| ≤median                                     | 1.00 |           | 0.004  |
| >median                                     | 2.14 | 1.27-3.61 |        |
| White blood cell count (10 <sup>9</sup> /l) |      |           |        |
| ≤median                                     | 1.00 |           | 0.559  |
| >median                                     | 0.86 | 0.51-1.44 |        |
| Neutrophil count (10 <sup>9</sup> /l)       |      |           |        |
| ≤median                                     | 1.00 |           | 0.528  |
| >median                                     | 0.85 | 0.50-1.42 |        |
| Neutropenia (10 <sup>9</sup> /l)            |      |           |        |
| ≤0.5                                        | 1.00 |           | 0.006  |
| >0.5                                        | 2.32 | 1.27-4.24 |        |
| Lymphocyte count (10 <sup>9</sup> /l)       |      |           |        |
| ≤median                                     | 1.00 |           | 0.022  |
| >median                                     | 0.53 | 0.31-0.91 |        |
| Hemoglobin (g/l)                            |      |           |        |
| ≤median                                     | 1.00 |           | <0.001 |
| >median                                     | 0.31 | 0.18-0.55 |        |
| Platelet count (10 <sup>9</sup> /l)         |      |           |        |
| ≤median                                     | 1.00 |           | <0.001 |
| >median                                     | 0.33 | 0.18-0.59 |        |
| Creatinine (μmol/l)                         |      |           |        |
| ≤median                                     | 1.00 |           | 0.205  |
| >median                                     | 1.40 | 0.83-2.35 |        |
| Bilirubin (μmol/l)                          |      |           |        |
| ≤ median                                    | 1.00 |           | <0.001 |
| >median                                     | 3.10 | 1.74-5.51 |        |

|                                        |      |           |       |
|----------------------------------------|------|-----------|-------|
| Serum potassium<br>(mmol/l)            |      |           |       |
| ≤ median                               | 1.00 |           | 0.938 |
| >median                                | 1.02 | 0.60-1.72 |       |
| Brain natriuretic<br>peptide (pg/ml)   |      |           |       |
| ≤ median                               | 1.00 |           | 0.002 |
| >median                                | 2.37 | 1.39-4.05 |       |
| Fibrin degradation<br>product (mg/l)   |      |           |       |
| ≤ median                               | 1.00 |           | 0.002 |
| >median                                | 2.38 | 1.39-4.07 |       |
| D-dimer (μg/l)                         |      |           |       |
| ≤ median                               | 1.00 |           | 0.036 |
| >median                                | 1.76 | 1.04-2.97 |       |
| Treatment at admission                 |      |           |       |
| Use of vasoactive<br>drugs             |      |           |       |
| No                                     | 1.00 |           | 0.003 |
| Yes                                    | 2.21 | 1.30-3.74 |       |
| Non-invasive<br>mechanical ventilation |      |           |       |
| No                                     | 1.00 |           | 0.070 |
| Yes                                    | 0.60 | 0.35-1.04 |       |
| Invasive mechanical<br>ventilation     |      |           |       |
| No                                     | 1.00 |           | 0.005 |
| Yes                                    | 2.15 | 1.26-3.68 |       |
| Continuous renal                       |      |           |       |

|                     |      |           |       |
|---------------------|------|-----------|-------|
| replacement therapy |      |           |       |
| No                  | 1.00 |           | 0.250 |
| Yes                 | 1.60 | 0.72-3.54 |       |
| Plasma exchange     |      |           |       |
| No                  | 1.00 |           | 0.138 |
| Yes                 | 1.54 | 0.87-2.71 |       |

HCT-CI, hematopoietic cell transplantation comorbidity Index; APACHE II, acute physiology and chronic health evaluation II; ICU, intensive care unit.

Table SV. Univariable analyses of leading cause for respiratory failure mortality.

| Variable                                | HR    | 95% CI     | P-value |
|-----------------------------------------|-------|------------|---------|
| Sex                                     |       |            |         |
| Male                                    | 1.00  |            | 0.678   |
| Female                                  | 1.19  | 0.52-2.76  |         |
| Age                                     |       |            |         |
| ≤median                                 | 1.00  |            | 0.642   |
| >median                                 | 0.82  | 0.35-1.92  |         |
| Hematologic malignancies                |       |            |         |
| Acute leukemia                          | 1.00  |            |         |
| Chronic leukemia                        | 2.88  | 0.82-10.12 | 1.000   |
| Lymphoma                                | 0.61  | 0.14-2.72  | 0.513   |
| Myelodysplastic syndromes               | 1.86  | 0.54-6.47  | 0.328   |
| Other                                   | 1.051 | 0.13-8.41  | 0.963   |
| Hematopoietic stem cell transplantation |       |            |         |
| Identical sibling donor                 | 1.00  |            |         |
| Haploidentical donor                    | 1.02  | 0.62-1.67  | 0.938   |
| Reason for ICU admission                |       |            |         |
| Respiratory failure                     |       |            |         |
| No                                      | 1.00  |            | 0.060   |
| Yes                                     | 2.60  | 0.96-7.05  |         |
| Liver failure                           |       |            |         |
| No                                      | 1.00  |            | 0.142   |
| Yes                                     | 0.22  | 0.03-1.65  |         |
| Acute kidney injury                     |       |            |         |
| No                                      | 1.00  |            | 0.915   |
| Yes                                     | 1.12  | 0.15-8.35  |         |
| Unconsciousness                         |       |            |         |
| No                                      | 1.00  |            | 0.565   |

|                                             |       |                |       |
|---------------------------------------------|-------|----------------|-------|
| Yes                                         | 0.05  | 0.0-1653.0     |       |
| Alveolar hemorrhage                         |       |                |       |
| No                                          | 1.00  |                | 0.04  |
| Yes                                         | 3.64  | 1.06-12.48     |       |
| Cerebrovascular disease                     |       |                |       |
| No                                          | 1.00  |                | 0.685 |
| Yes                                         | 0.048 | 0.00-111433.77 |       |
| Heart failure                               |       |                |       |
| No                                          | 1.00  |                | 0.644 |
| Yes                                         | 0.05  | 0.00-19607.32  |       |
| Septic shock                                |       |                |       |
| No                                          | 1.00  |                | 0.369 |
| Yes                                         | 0.05  | 0.00-41.64     |       |
| HCT-CI                                      |       |                |       |
| ≤median                                     | 1.00  |                | 0.198 |
| >median                                     | 1.77  | 0.77-3.65      |       |
| APACHE II score at admission                |       |                |       |
| ≤median                                     | 1.00  |                | 0.016 |
| >median                                     | 2.69  | 1.20-6.02      |       |
| Laboratory test on day of ICU admission     |       |                |       |
| Lactate (mmol/l)                            |       |                |       |
| ≤median                                     | 1.00  |                | 0.403 |
| >median                                     | 1.39  | 0.64-3.02      |       |
| White blood cell count (10 <sup>9</sup> /l) |       |                |       |
| ≤median                                     | 1.00  |                | 0.470 |
| > median                                    | 1.33  | 0.61-2.91      |       |
| Neutrophil count (10 <sup>9</sup> /l)       |       |                |       |
| ≤median                                     | 1.00  |                | 0.806 |
| >median                                     | 1.102 | 0.51-2.39      |       |

|                                   |      |           |        |
|-----------------------------------|------|-----------|--------|
| Neutropenia ( $10^9/l$ )          |      |           |        |
| ≤0.5                              | 1.00 |           | 0.276  |
| >0.5                              | 1.75 | 0.64-4.79 |        |
| Lymphocyte count ( $10^9/l$ )     |      |           |        |
| ≤median                           | 1.00 |           | 0.554  |
| >median                           | .28  | 0.57-2.88 |        |
| Hemoglobin (g/l)                  |      |           |        |
| ≤median                           | 1.00 |           | <0.004 |
| >median                           | 0.29 | 0.13-0.67 |        |
| Platelet count ( $10^9/l$ )       |      |           |        |
| ≤median                           | 1.00 |           | 0.027  |
| >median                           | 0.36 | 0.15-0.89 |        |
| Creatinine ( $\mu\text{mol/l}$ )  |      |           |        |
| ≤median                           | 1.00 |           | 0.680  |
| >median                           | 1.18 | 0.53-2.62 |        |
| Bilirubin ( $\mu\text{mol/l}$ )   |      |           |        |
| ≤ median                          | 1.00 |           | 0.915  |
| >median                           | 0.96 | 0.42-2.16 |        |
| Serum potassium (mmol/l)          |      |           |        |
| ≤median                           | 1.00 |           | 0.685  |
| >median                           | 0.85 | 0.38-1.88 |        |
| Brain natriuretic peptide (pg/ml) |      |           |        |
| ≤median                           | 1.00 |           | 0.133  |
| >median                           | 1.82 | 0.83-3.98 |        |
| Fibrin degradation product (mg/l) |      |           |        |
| ≤median                           | 1.00 |           | 0.043  |
| >median                           | 2.31 | 1.03-5.19 |        |
| D-dimer ( $\mu\text{g/l}$ )       |      |           |        |

|                                      |      |           |       |
|--------------------------------------|------|-----------|-------|
| ≤median                              | 1.00 |           | 0.637 |
| >median                              | 1.22 | 0.54-2.72 |       |
| Treatment at admission               |      |           |       |
| Use of vasoactive drugs              |      |           |       |
| No                                   | 1.00 |           | 0.505 |
| Yes                                  | 0.72 | 0.27-1.92 |       |
| Non-invasive mechanical ventilation  |      |           |       |
| No                                   | 1.00 |           | 0.082 |
| Yes                                  | 2.26 | 0.90-5.68 |       |
| Invasive mechanical ventilation      |      |           |       |
| No                                   | 1.00 |           | 0.533 |
| Yes                                  | 1.47 | 0.44-5.00 |       |
| Continuous renal replacement therapy |      |           |       |
| No                                   | 1.00 |           | 0.49  |
| Yes                                  | 0.49 | 0.07-3.67 |       |
| Plasma exchange                      |      |           |       |
| No                                   | 1.00 |           | 0.235 |
| Yes                                  | 0.48 | 0.14-1.62 |       |

HCT-CI, hematopoietic cell transplantation comorbidity Index; APACHE II, acute physiology and chronic health evaluation II; ICU, intensive care unit.
